# Supplementary material for: Radiological Challenges of T2 relaxation time in Hemophilic Arthropathy and its Consequences on Management: A Case Control Study
Source: Research Square preprint supplement (doi:10.21203/rs.3.rs-6890138/v1), 2025-07-14
Supplement: Supplementary file 1 [file 019a7a647603cc1f7371097c.docx]

**Table (1):**

|  | **Patients’ group**  **(N = 55)** |
| --- | --- |
| **Type of Hemophilia** | |
| A | 46 (83.6%) |
| B | 9 (16.4%) |
| **Number of Bleeds** | 11.3 ± 5.28 |
| **Age of First Bleed** | 2.13 ± 1.35 |
| **Age Start Prophylaxis** | 3.62 ± 2.08 |
| **Acute/Chronic** | |
| Acute | 8 (14.5%) |
| Chronic | 47 (85.5%) |
| **Severity of Hemophilia** | |
| Mild | 7 (12.7%) |
| Moderate | 7 (12.7%) |
| Severe | 41 (74.5%) |
| **FVIII or IX Level (%)** | 24.1 ± 15.0 |
