# Supplementary material for: Radiological Challenges of T2 relaxation time in Hemophilic Arthropathy and its Consequences on Management: A Case Control Study
Source: Research Square preprint supplement (doi:10.21203/rs.3.rs-6890138/v1), 2025-07-14
Supplement: Supplementary file 2 [file 5f4c1a5db95ebf972edda2ae.docx]

**Table (4):**

| **Independent Variables** | **Univariate analysis** | | | **Multivariate analysis** | | |
| --- | --- | --- | --- | --- | --- | --- |
|  | **Estimate** | **t** | **p** | **Estimate** | **t** | **p** |
| **Age** | 0.278 | 1.22 | 0.224 |  |  |  |
| **Type of Hemophilia (B vs. A)** | 1.43 | 1.89 | 0.064 |  |  |  |
| **Age of First Bleed** | 0.239 | 1.11 | 0.271 |  |  |  |
| **Age Start Prophylaxis** | -0.0266 | -0.189 | 0.851 |  |  |  |
| **Acute/Chronic (Chronic vs. Acute)** | -0.965 | -1.19 | 0.239 |  |  |  |
| **Severity of Hemophilia (Moderate vs. Mild)** | 1.429 | 1.33 | 0.190 |  |  |  |
| **Severity of Hemophilia (Severe vs. Mild)** | -0.895 | -1.09 | 0.282 |  |  |  |
| **HEAD-US Score** | 1.023 | 16.72 | < .001* |  |  |  |
| **FVIII or IX Level (%)** | 0.0181 | 0.935 | 0.354 |  |  |  |
| **Number of Bleeds** | -0.0256 | -0.463 | 0.645 |  |  |  |
| **Microbleeds in conventional MRI** | 4.69 | 3.96 | < .001* | -1.157 | -0.893 | 0.374 |
| **Microbleeds in SWI** | 5.48 | 5.76 | < .001* | 3.563 | 3.124 | 0.002* |
| **T2 values at patella** | 0.375 | 4.41 | < .001* | 0.166 | 2.517 | 0.013* |
| **T2 values at medial tibial plateau** | 0.286 | 4.71 | < .001* | 0.101 | 2.083 | 0.040* |
| **T2 values at lateral tibial plateau** | 0.298 | 5.01 | < .001* | 0.142 | 2.820 | 0.006* |
| **T2 values at medial femoral condyle** | 0.281 | 5.14 | < .001* | 0.163 | 3.736 | < .001* |
| **T2 values at lateral femoral condyle** | 0.278 | 5.27 | < .001* | 0.164 | 3.896 | < .001* |
