# Supplementary material for: Radiological Challenges of T2 relaxation time in Hemophilic Arthropathy and its Consequences on Management: A Case Control Study
Source: Research Square preprint supplement (doi:10.21203/rs.3.rs-6890138/v1), 2025-07-14
Supplement: Supplementary file 3 [file aab9b82935632556ee38805d.docx]

**Table (3):**

| **T2 Values at different locations** | **MRI Score**  **(Pearson's r, p-value)** |
| --- | --- |
| **T2 values at the patella** | 0.398 (<0.001)* |
| **T2 values at the medial tibial plateau** | 0.421 (<0.001)* |
| **T2 values at the lateral tibial plateau** | 0.443 (<0.001)* |
| **T2 values at the medial femoral condyle** | 0.452 (<0.001)* |
| **T2 values at the lateral femoral condyle** | 0.461 (<0.001)* |
