# Supplementary material for: Radiological Challenges of T2 relaxation time in Hemophilic Arthropathy and its Consequences on Management: A Case Control Study
Source: Research Square preprint supplement (doi:10.21203/rs.3.rs-6890138/v1), 2025-07-14
Supplement: Supplementary file 4 [file b04f8e704ba9f834efc20838.docx]

**Table (2):**

|  | **Patients’ group**  **(N = 55)** | **Control group**  **(N = 50)** | **Test** | **p-value** |
| --- | --- | --- | --- | --- |
| **HEAD-US Score** | | | | |
| Mean ± SD | 8.11 ± 1.98 | 0.14 ± 0.351 | U = 0.00 | <0.001* |
| Median (IQR) | 8 (9 – 11.5) | 0 (0 - 0) |
| **MRI Score** | | | | |
| Mean ± SD | 9.8 ± 2.13 | 0.15 ± 0.321 | U = 0.00 | <0.001* |
| Median (IQR) | 10 (7 - 10) | 0 (0 - 0) |
| **T2 values** | | | | |
| At patella | 47.2 ± 5.68 | 42.5 ± 3.77 | t = 5.02 | <0.001* |
| At medial tibial plateau | 47.9 ± 8.63 | 41.4 ± 3.8 | t = 4.93 | <0.001* |
| At lateral tibial plateau | 49.9 ± 7.95 | 42.0 ± 4.28 | t = 6.25 | <0.001* |
| At medial femoral condyle | 55.8 ± 8.42 | 49.0 ± 6.31 | t = 4.64 | <0.001* |
| At lateral femoral condyle | 55.4 ± 8.71 | 47.9 ± 6.08 | t = 5.11 | <0.001* |
| **Microbleed** | |  |  |  |
| By conventional MRI | 19 (34.5%) | 1 (2.0%) | χ 2 = 18.0 | <0.001* |
| By SWI | 29 (52.7%) | 2 (4.0%) | χ 2 = 29.9 | <0.001* |
